# Supplementary material for: Development of octadecyl-functionalized-nanotubular TiO2/Ti wire solid-phase microextraction fiber
Source: Royal Society of Chemistry journal article supplement (doi:10.1039/c2an36315a), 2012-11-09
Supplement: c2an36315a.pdf [file c2an36315a.pdf]

## Electronic supporting information

### Development of octadecyl-functionalized-nanotubular TiO<sub>2</sub>/Ti wire solid-phase microextraction fiber

*Chunyan Chen, Shaolei Yang, Di Pan, Yiming Long, Zhihong Yan, Qingyun Cai\*,  
Shouzhuo Yao\**

*State Key Laboratory of Chemo/Biosensing & Chemometrics, College of Chemistry &  
Chemical Engineering, Hunan University, Changsha 410082, China*

---

\* Corresponding authors. Tel.: +86-731-88821968 (S. Yao);  
E-mail: szyao@hnu.edu.cn (S. Yao), qycail0001@hnu.edu.cn (Q. Cai)

## 2. Experimental

### 2.2. Instrumentation

Table S1 The excitation and emission wavelength program used for determination of PAHs.

| PAHs          | Time (min) | $\lambda_{ex}$ (nm) | $\lambda_{em}$ (nm) |
|---------------|------------|---------------------|---------------------|
| Flu           | 0          | 260                 | 340                 |
| FIA           | 15         | 289                 | 462                 |
| Pyr           | 17.5       | 320                 | 380                 |
| BaA, BbF, BkF | 21         | 294                 | 430                 |

## 3. Results and discussion

### 3.1. Characterization of the SPME fiber

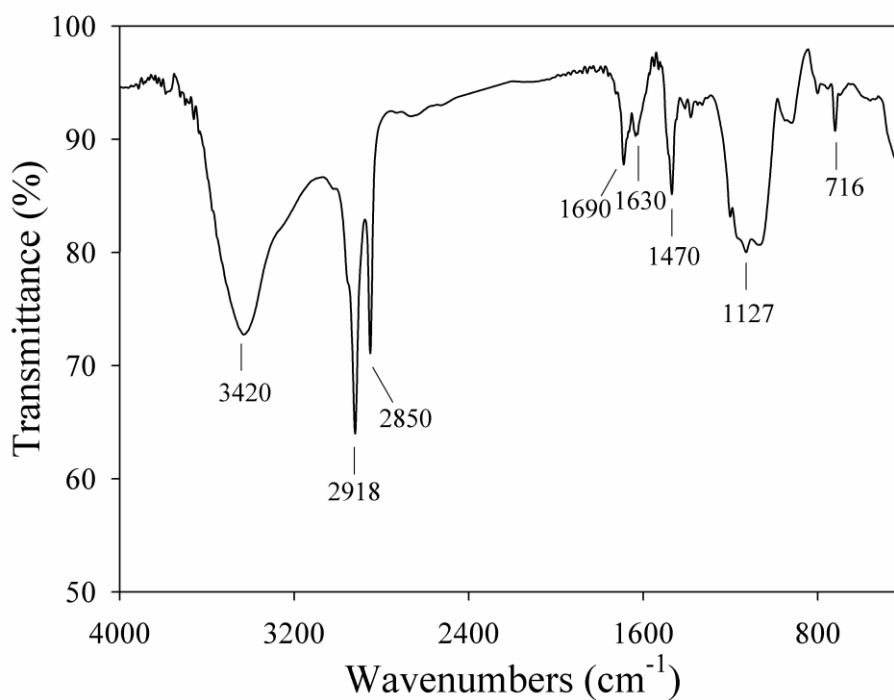

Fig.S1. FTIR absorption spectrum of the sol-gel coating.

### 3.2. Performance of the SPME fiber

#### 3.2.2. Thermal stability

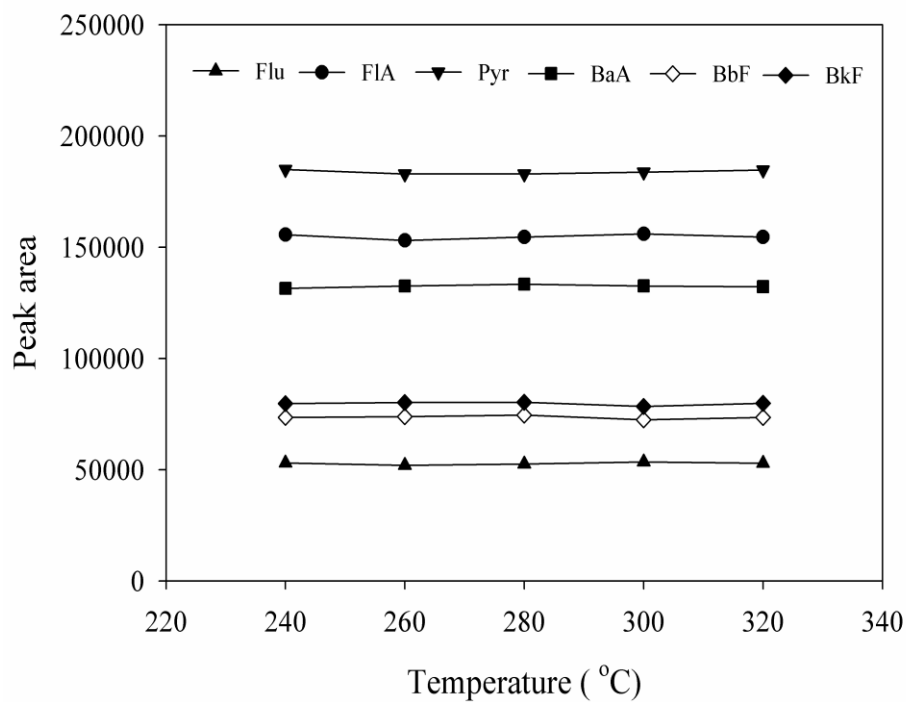

Fig.S2. The thermal stability of the SPME fiber. The extraction capability toward PAHs after the SPME fiber was heated at different temperatures. Experiment conditions: extraction time, 60 min; desorption solvent, acetonitrile; desorption time, 20 min. Concentrations of Flu, FlA, Pyr, BaA, BbF and BkF are 1.8, 10.0, 5.0, 1.8, 1.8, 0.5 ng mL<sup>-1</sup>, respectively.

### 3.4. Optimization of SPME

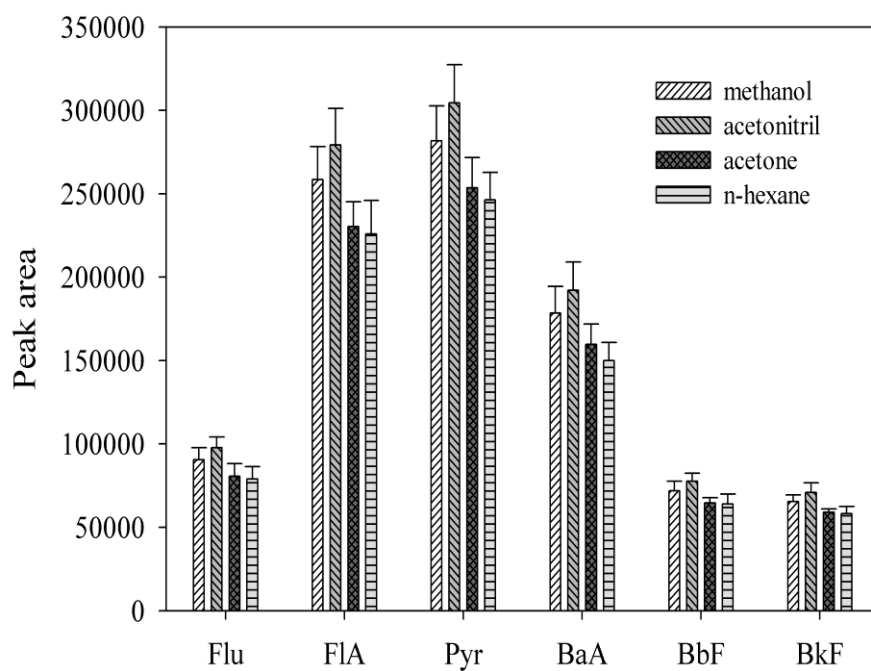

Fig.S3. The effects of desorption solvents on the extraction efficiency of the proposed fiber. Experiment conditions: extraction time, 60 min; salt addition, 10% (w/v); desorption time, 20 min. Desorption solvent volume (500  $\mu\text{L}$ ) was concentrated to 100  $\mu\text{L}$  by  $\text{N}_2$ . Spiked concentration: Flu, 0.38  $\text{ng mL}^{-1}$ ; FlA, 2.0  $\text{ng mL}^{-1}$ ; Pyr, 1.0  $\text{ng mL}^{-1}$ ; BaA, 0.38  $\text{ng mL}^{-1}$ ; BbF, 0.38  $\text{ng mL}^{-1}$ ; BkF, 0.10  $\text{ng mL}^{-1}$ .

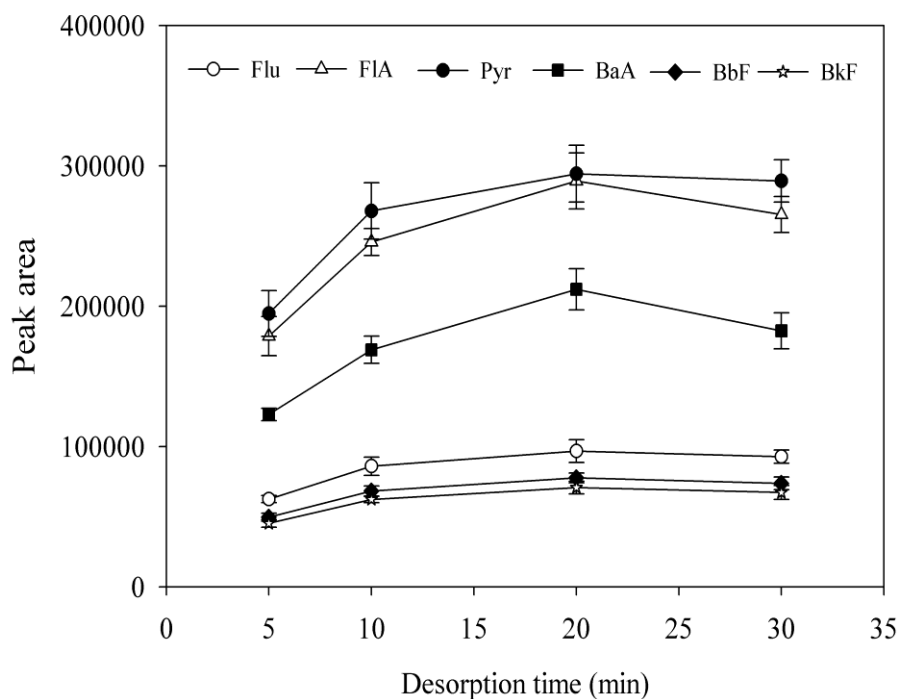

Fig.S4. The effects of desorption time on the extraction efficiency of the proposed fiber. Experiment conditions: extraction time, 60 min; salt addition, 10% (w/v); desorption solvent, acetonitril. Desorption solvent volume (500  $\mu\text{L}$ ) was concentrated to 100  $\mu\text{L}$  by  $\text{N}_2$ . Spiked concentration: Flu, 0.38  $\text{ng mL}^{-1}$ ; FIA, 2.0  $\text{ng mL}^{-1}$ ; Pyr, 1.0  $\text{ng mL}^{-1}$ ; BaA, 0.38  $\text{ng mL}^{-1}$ ; BbF, 0.38  $\text{ng mL}^{-1}$ ; BkF, 0.10  $\text{ng mL}^{-1}$ .

### 3.5. Analytical performance and application

Table S2 Analytical results for the determination of PAHs in real water samples (n = 3).

| Compounds | Detected                 | RSD | Spiked                   | Recovery | RSD |
|-----------|--------------------------|-----|--------------------------|----------|-----|
|           | concentrations           |     |                          |          |     |
|           | (no spiking)             | (%) | ( $\mu\text{g L}^{-1}$ ) | (%)      | (%) |
|           | ( $\mu\text{g L}^{-1}$ ) |     |                          |          |     |
| Flu       | 0.053                    | 4.8 | 0.38                     | 92.6     | 6.1 |
| FlA       | n.d. <sup>a</sup>        | -   | 2.0                      | 101.8    | 7.3 |
| Pyr       | n.d.                     | -   | 1.0                      | 90.7     | 3.6 |
| BaA       | n.d.                     | -   | 0.38                     | 97.2     | 9.4 |
| BbF       | n.d.                     | -   | 0.38                     | 88.4     | 5.8 |
| BkF       | n.d.                     | -   | 0.1                      | 85.3     | 6.3 |

<sup>a</sup> n.d.: not detected.
